# Supplementary material for: Albumin-to-Alkaline Phosphatase Ratio as a Prognostic Biomarker for Spinal Fusion in Lumbar Degenerative Diseases Patients Undergoing Lumbar Spinal Fusion
Source: MDPI journal article supplement (doi:10.3390/jcm11164719), 2022-08-12
Supplement: s1 [file s1]

Table S1. Univariate and multivariate analysis model 3 (ALP) of risk factors for severe degeneration.

| Variables     | Univariate          |         | Multivariate          |         |
|---------------|---------------------|---------|-----------------------|---------|
|               | OR (95% CI)         | p       | OR (95% CI)           | p       |
| Age(year)     | 1.042(1.023-1.062)  | < 0.001 | 1.027 (0.999-1.055)   | 0.056   |
| Gender(male)  | 0.878(0.565-1.364)  | 0.562   | 0.998(0.504-1.978)    | 0.996   |
| BMI           | 0.971(0.913-1.034)  | 0.358   | 0.974(0.900-1.055)    | 0.524   |
| Smoking       | 1.124(0.587-2.151)  | 0.724   | 1.375(0.579-3.262)    | 0.470   |
| Alcohol abuse | 1.865(0.837-4.155)  | 0.127   | 1.992(0.732-5.419)    | 0.177   |
| Hypertension  | 1.574(1.015-2.443)  | 0.043   | 1.139(0.632-2.055)    | 0.664   |
| DM            | 1.117(0.630-1.982)  | 0.704   | 0.898(0.385-2.095)    | 0.804   |
| CHD           | 0.789(0.402-1.548)  | 0.490   | 0.376(0.163-0.869)    | 0.022   |
| Osteoporosis  | 1.734(1.096-2.742)  | 0.019   | 1.070(0.599-1.912)    | 0.820   |
| Calcification | 4.797(2.993-7.689)  | < 0.001 | 3.445(1.950-6.085)    | < 0.001 |
| ALP           | 1.020(1.010-1.030)  | < 0.001 | 1.011(0.999-1.022)    | 0.079   |
| Calcium       | 6.241(0.649-59.996) | 0.113   | 10.549(0.610-182.457) | 0.105   |
| phosphorus    | 0.618(0.166-2.308)  | 0.474   | 1.405(0.286-6.895)    | 0.675   |
| FBG           | 1.096(0.944-1.274)  | 0.229   | 1.080(0.868-1.342)    | 0.491   |
| BUN           | 0.988(0.873-1.118)  | 0.850   | 0.971(0.820-1.151)    | 0.737   |
| Scr           | 1.001(0.992-1.010)  | 0.839   | 1.002(0.987-1.018)    | 0.757   |
| UA            | 0.999(0.996-1.002)  | 0.472   | 1.001(0.997-1.004)    | 0.802   |
| ALT           | 0.993(0.977-1.009)  | 0.405   | 0.999(0.964-1.035)    | 0.934   |
| AST           | 1.011(0.985-1.038)  | 0.408   | 0.998(0.943-1.056)    | 0.950   |
| RBP           | 0.960(0.937-0.984)  | 0.001   | 0.949(0.920-0.978)    | 0.001   |

BMI, body mass index; AAR, albumin-to-alkaline phosphatase ratio; FBG, fasting blood glucose; CHD, coronary heart disease; DM, diabetes mellitus; ALT, alanine transaminase; AST, aspartate transaminase; RBP, retinol-binding protein; UA, uric acid; BUN, blood urea nitrogen; Scr, serum creatinine.

Table S2. Univariate and multivariate analysis model 4 (ALB) of risk factors for severe degeneration.

| Variables     | Univariate          |         | Multivariate          |         |
|---------------|---------------------|---------|-----------------------|---------|
|               | OR (95% CI)         | p       | OR (95% CI)           | p       |
| Age(year)     | 1.042(1.023-1.062)  | < 0.001 | 1.023(0.996-1.051)    | 0.096   |
| Gender(male)  | 0.878(0.565-1.364)  | 0.562   | 1.006(0.508-1.993)    | 0.987   |
| BMI           | 0.971(0.913-1.034)  | 0.358   | 0.974(0.899-1.054)    | 0.512   |
| Smoking       | 1.124(0.587-2.151)  | 0.724   | 1.360(0.578-3.199)    | 0.481   |
| Alcohol abuse | 1.865(0.837-4.155)  | 0.127   | 2.085(0.774-5.618)    | 0.146   |
| Hypertension  | 1.574(1.015-2.443)  | 0.043   | 1.133(0.631-2.036)    | 0.675   |
| DM            | 1.117(0.630-1.982)  | 0.704   | 0.858(0.369-1.993)    | 0.722   |
| CHD           | 0.789(0.402-1.548)  | 0.490   | 0.432(0.192-0.973)    | 0.043   |
| Osteoporosis  | 1.734(1.096-2.742)  | 0.019   | 1.099(0.617-1.958)    | 0.748   |
| Calcification | 4.797(2.993-7.689)  | < 0.001 | 4.300(2.542-7.273)    | < 0.001 |
| ALB           | 0.986(0.922-1.053)  | 0.671   | 0.976(0.889-1.072)    | 0.612   |
| Calcium       | 6.241(0.649-59.996) | 0.113   | 15.194(0.642-359.720) | 0.092   |
| phosphorus    | 0.618(0.166-2.308)  | 0.474   | 1.164(0.238-5.693)    | 0.852   |
| FBG           | 1.096(0.944-1.274)  | 0.229   | 1.098(0.886-1.362)    | 0.392   |
| BUN           | 0.988(0.873-1.118)  | 0.850   | 0.979(0.825-1.161)    | 0.806   |
| Scr           | 1.001(0.992-1.010)  | 0.839   | 0.999(0.984-1.015)    | 0.910   |
| UA            | 0.999(0.996-1.002)  | 0.472   | 1.001(0.997-1.004)    | 0.785   |
| ALT           | 0.993(0.977-1.009)  | 0.405   | 0.995(0.961-1.031)    | 0.799   |
| AST           | 1.011(0.985-1.038)  | 0.408   | 1.007(0.951-1.066)    | 0.812   |
| RBP           | 0.960(0.937-0.984)  | 0.001   | 0.952(0.923-0.982)    | 0.002   |

BMI, body mass index; AAR, albumin-to-alkaline phosphatase ratio; FBG, fasting blood glucose; CHD, coronary heart disease; DM, diabetes mellitus; ALT, alanine transaminase; AST, aspartate transaminase; RBP, retinol-binding protein; UA, uric acid; BUN, blood urea nitrogen; Scr, serum creatinine.

Table S3. Univariate and multivariate analysis model 5 (ALP) of risk factors for non-fusion

| Variables     | Univariate          |         | Multivariate          |         |
|---------------|---------------------|---------|-----------------------|---------|
|               | OR (95% CI)         | p       | OR (95% CI)           | p       |
| Age(year)     | 0.995(0.977-1.013)  | 0.569   | 0.995(0.968-1.023)    | 0.736   |
| Gender(male)  | 0.630(0.385-1.031)  | 0.066   | 0.607(0.276-1.336)    | 0.215   |
| BMI           | 0.973(0.909-1.042)  | 0.432   | 0.959(0.878-1.046)    | 0.345   |
| Smoking       | 1.086(0.538-2.191)  | 0.819   | 1.944(0.751-5.034)    | 0.171   |
| Alcohol abuse | 0.826(0.337-2.023)  | 0.675   | 0.672(0.206-2.195)    | 0.511   |
| Hypertension  | 0.855(0.530-1.379)  | 0.520   | 1.076(0.565-2.048)    | 0.824   |
| DM            | 0.742(0.385-1.432)  | 0.374   | 0.635(0.219-1.840)    | 0.403   |
| CHD           | 0.470(0.200-1.102)  | 0.082   | 0.284(0.093-0.868)    | 0.027   |
| Osteoporosis  | 1.222(0.746-2.002)  | 0.426   | 1.043(0.544-1.998)    | 0.899   |
| Calcification | 1.581(0.977-2.559)  | 0.062   | 0.741(0.386-1.423)    | 0.368   |
| ALP           | 1.034(1.022-1.046)  | < 0.001 | 1.047(1.031-1.063)    | < 0.001 |
| Calcium       | 1.616(0.144-18.189) | 0.697   | 0.230(0.009-5.732)    | 0.370   |
| phosphorus    | 9.892(2.270-43.106) | 0.002   | 22.097(3.606-135.393) | 0.001   |
| FBG           | 1.024(0.873-1.201)  | 0.770   | 1.094(0.852-1.405)    | 0.480   |
| BUN           | 0.985(0.859-1.128)  | 0.823   | 1.028(0.854-1.236)    | 0.773   |
| Scr           | 0.988(0.976-1.001)  | 0.062   | 0.997(0.976-1.017)    | 0.740   |
| UA            | 1.001(0.998-1.004)  | 0.531   | 1.005(1.001-1.010)    | 0.020   |
| ALT           | 1.002(0.986-1.018)  | 0.808   | 0.996(0.960-1.034)    | 0.842   |
| AST           | 1.014(0.987-1.041)  | 0.318   | 0.999(0.943-1.058)    | 0.960   |
| RBP           | 0.988(0.963-1.014)  | 0.356   | 0.979(0.950-1.009)    | 0.170   |

BMI, body mass index; AAR, albumin-to-alkaline phosphatase ratio; FBG, fasting blood glucose; CHD, coronary heart disease; DM, diabetes mellitus; ALT, alanine transaminase; AST, aspartate transaminase; RBP, retinol-binding protein; UA, uric acid; BUN, blood urea nitrogen; Scr, serum creatinine.

Table S4. Univariate and multivariate analysis model 6 (ALB) of risk factors for non-fusion

| Variables     | Univariate          |       | Multivariate        |       |
|---------------|---------------------|-------|---------------------|-------|
|               | OR (95% CI)         | p     | OR (95% CI)         | p     |
| Age(year)     | 0.995(0.977-1.013)  | 0.569 | 0.988(0.962-1.014)  | 0.351 |
| Gender(male)  | 0.630(0.385-1.031)  | 0.066 | 0.723(0.352-1.485)  | 0.377 |
| BMI           | 0.973(0.909-1.042)  | 0.432 | 0.953(0.880-1.032)  | 0.239 |
| Smoking       | 1.086(0.538-2.191)  | 0.819 | 1.614(0.677-3.849)  | 0.280 |
| Alcohol abuse | 0.826(0.337-2.023)  | 0.675 | 1.035(0.374-2.865)  | 0.948 |
| Hypertension  | 0.855(0.530-1.379)  | 0.520 | 1.046(0.575-1.906)  | 0.882 |
| DM            | 0.742(0.385-1.432)  | 0.374 | 0.673(0.267-1.698)  | 0.401 |
| CHD           | 0.470(0.200-1.102)  | 0.082 | 0.486(0.188-1.256)  | 0.137 |
| Osteoporosis  | 1.222(0.746-2.002)  | 0.426 | 1.299(0.715-2.358)  | 0.390 |
| Calcification | 1.581(0.977-2.559)  | 0.062 | 1.853(1.068-3.213)  | 0.028 |
| ALB           | 1.014(0.943-1.091)  | 0.701 | 1.020(0.927-1.122)  | 0.685 |
| Calcium       | 1.616(0.144-18.189) | 0.697 | 0.239(0.009-6.250)  | 0.390 |
| phosphorus    | 9.892(2.270-43.106) | 0.002 | 9.005(1.761-46.050) | 0.008 |
| FBG           | 1.024(0.873-1.201)  | 0.770 | 1.144(0.910-1.437)  | 0.249 |
| BUN           | 0.985(0.859-1.128)  | 0.823 | 1.054(0.886-1.254)  | 0.552 |
| Scr           | 0.988(0.976-1.001)  | 0.062 | 0.986(0.967-1.004)  | 0.129 |
| UA            | 1.001(0.998-1.004)  | 0.531 | 1.004(1.0002-1.008) | 0.038 |
| ALT           | 1.002(0.986-1.018)  | 0.808 | 0.984(0.950-1.019)  | 0.372 |
| AST           | 1.014(0.987-1.041)  | 0.318 | 1.028(0.973-1.086)  | 0.329 |
| RBP           | 0.988(0.963-1.014)  | 0.356 | 0.985(0.955-1.015)  | 0.324 |

BMI, body mass index; AAR, albumin-to-alkaline phosphatase ratio; FBG, fasting blood glucose; CHD, coronary heart disease; DM, diabetes mellitus; ALT, alanine transaminase; AST, aspartate transaminase; RBP, retinol-binding protein; UA, uric acid; BUN, blood urea nitrogen; Scr, serum creatinine.
